# Supplementary material for: Efficient solar-driven hydrogen peroxide production enabled by a perovskite electrochemical device integrated with a cobalt-based chiral catalyst
Source: Royal Society of Chemistry journal article supplement (doi:10.1039/d5ee04313a), 2025-11-25
Supplement: d5ee04313a1.pdf [file d5ee04313a1.pdf]

## Electronic Supplementary Information

### Efficient Solar-Driven Hydrogen Peroxide Production Enabled by Perovskite Electrochemical Device Integrated with a Cobalt-Based Chiral Catalyst

Young Sun Park<sup>1‡</sup>, Jaerim Kim<sup>2,3‡</sup>, Subin Moon<sup>1‡</sup>, Eunji Ahn<sup>2,4</sup>, Hyeonwoong Hwang<sup>2</sup>, Sang-Hoon You<sup>2</sup>, Juwon Lee<sup>5</sup>, Chang-Seop Jeong<sup>1</sup>, Wooyong Jeong<sup>1</sup>, Hyoung-il Kim<sup>5</sup>, Yong-Tae Kim<sup>2</sup>, Kug-Seung Lee<sup>6</sup>, Donghwa Le<sup>2,4</sup>, Jong Kyu Kim<sup>2\*</sup>, and Jooho Moon<sup>1\*</sup>

<sup>1</sup> Department of Materials Science and Engineering, Yonsei University, Seoul 03722, Republic of Korea

<sup>2</sup> Department of Materials Science and Engineering, Pohang University of Science and Technology (POSTECH), 77 Cheongam-Ro, Nam-Gu, Pohang 37673, Republic of Korea

<sup>3</sup>Department of Chemistry, Northwestern University, 2145 Sheridan Road, Evanston, IL 60208, USA.

<sup>4</sup>Division of Advanced Materials Science, Pohang University of Science and Technology (POSTECH), 77 Cheongam-Ro, Nam-Gu, Pohang 37673, Republic of Korea

<sup>5</sup>Department of Civil & Environmental Engineering, Yonsei University, 50 Yonsei-ro Seodaemun-gu, Seoul 03722, Republic of Korea

<sup>6</sup>Pohang Accelerator Laboratory, Pohang University of Science and Technology, Pohang 37673, Republic of Korea

\*Correspondence: kimjk@postech.ac.kr, jmoon@yonsei.ac.kr

‡ These authors contributed equally.

**Keywords:** oxygen reduction reaction, hydrogen peroxide production, chiral catalyst, chirality-induced spin selectivity, spin polarization, photosynthesis

## Supplementary Figures

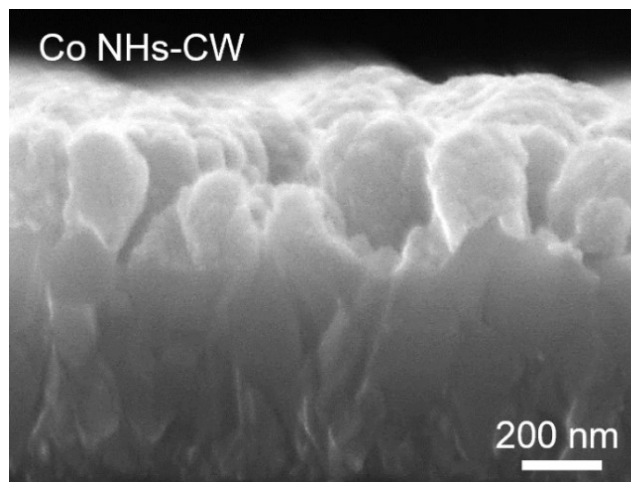

**Fig. S1** Cross-sectional SEM image of Co NHs-CW on FTO.

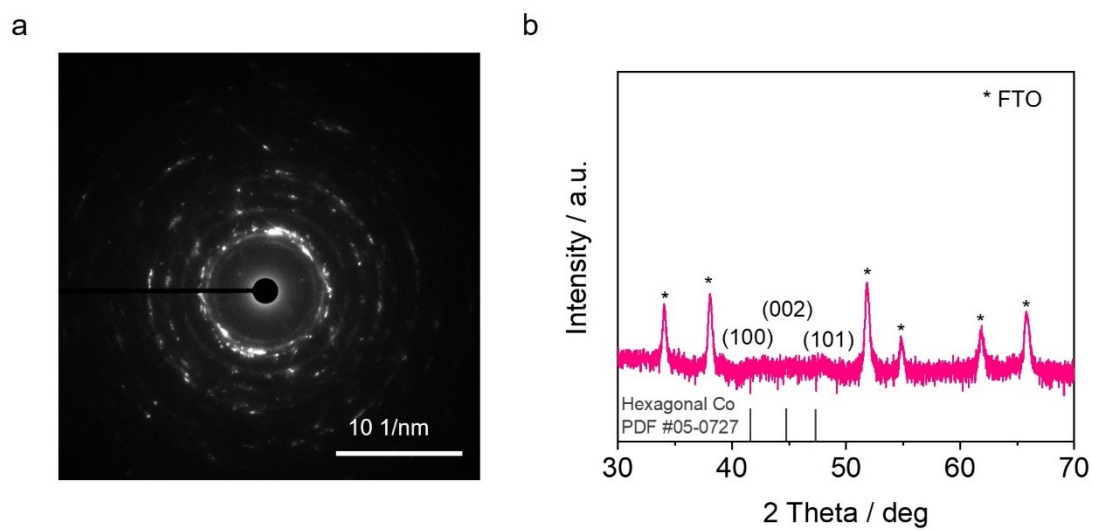

**Fig. S2** a) SAED and b) XRD patterns of Co NHs-CW catalyst.

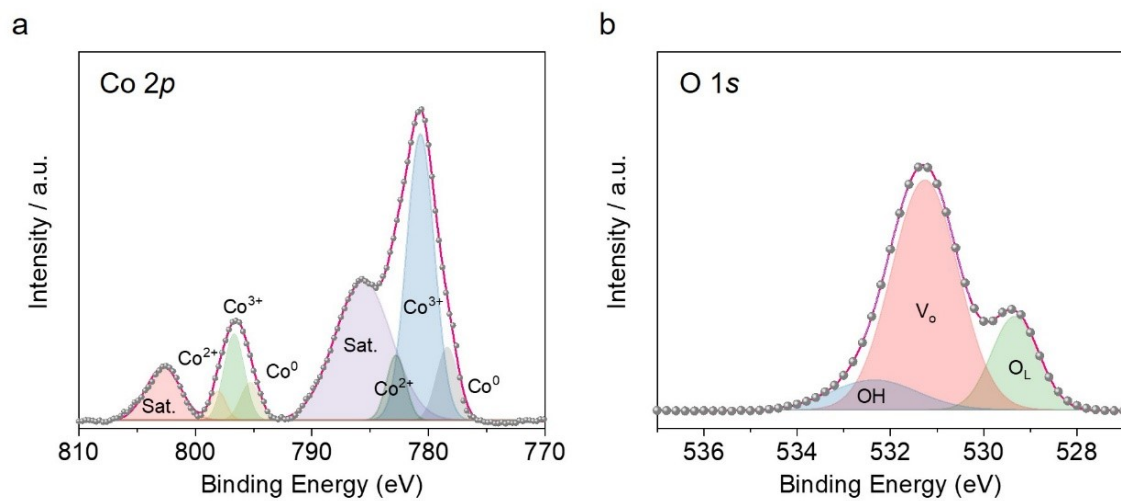

**Fig. S3** High-resolution XPS spectra of Co NHs-CW: deconvolutions of a) Co 2p and b) O 1s regions.

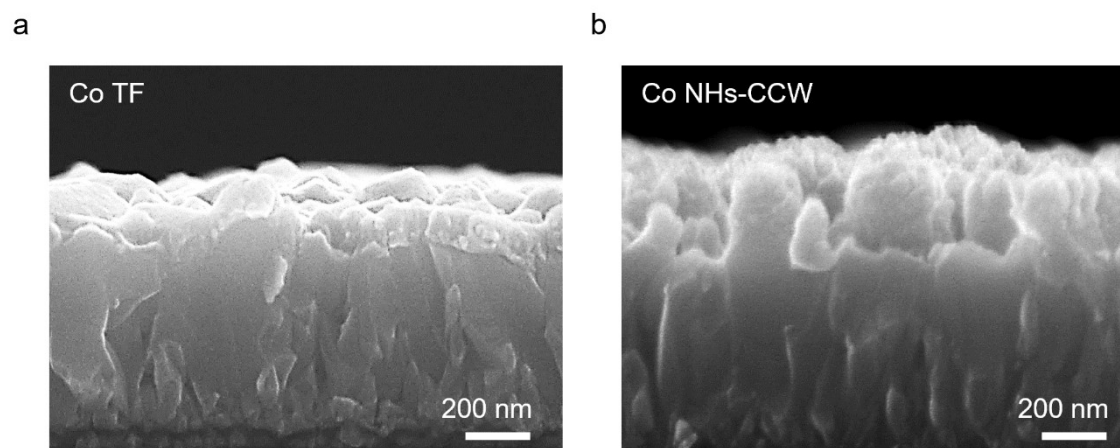

**Fig. S4** Cross-sectional SEM images of a) Co TF and b) Co CCW.

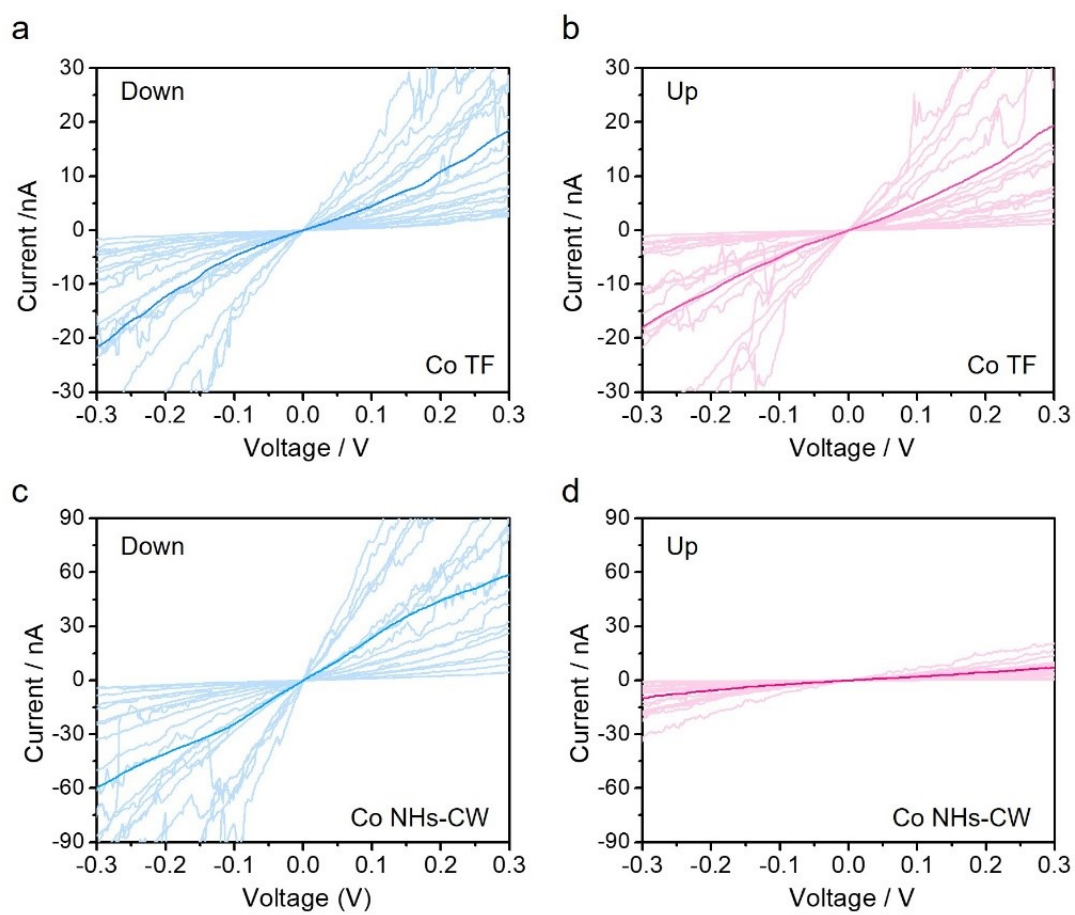

**Fig. S5** Raw data for  $I$ - $V$  curves obtained from mCP-AFM analysis with a pre-magnetized tip aligned along the upward or downward magnetic field orientations at different positions: a, b) Co TF and c, d) Co NHs-CW.

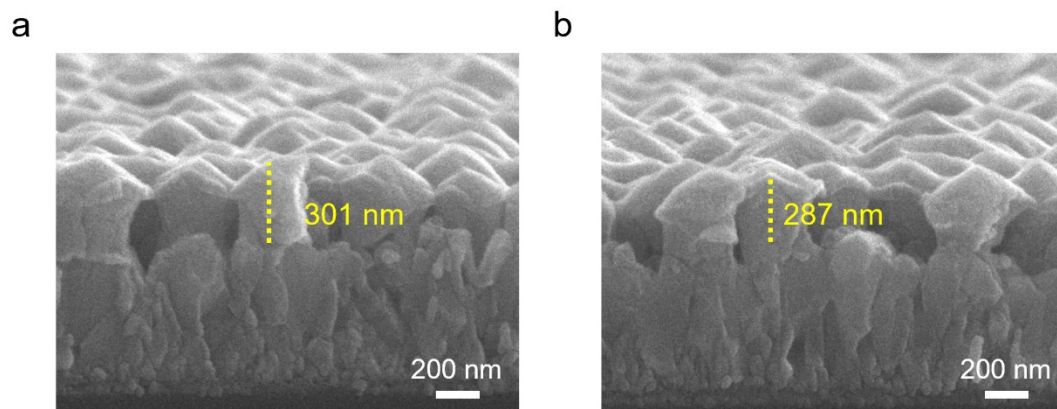

**Fig. S6** Cross-sectional SEM images of a) Co NHs-CW 10, and b) Co NHs-CW 15.

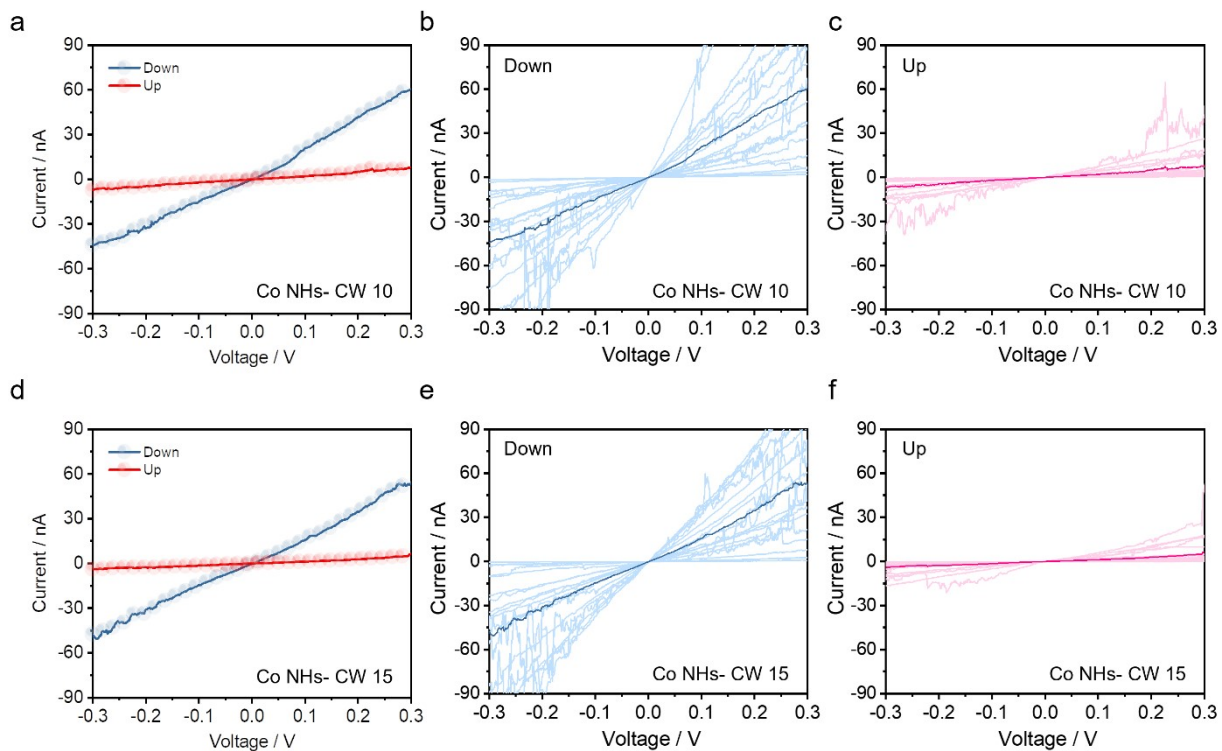

**Fig. S7** a),d) Average results and b), c), e), f) raw data for  $I$ – $V$  curves obtained from mCP-AFM measurements with a pre-magnetized tip aligned along the upward or downward magnetic field orientations at different positions on Co NHs-CW 10 and 15.



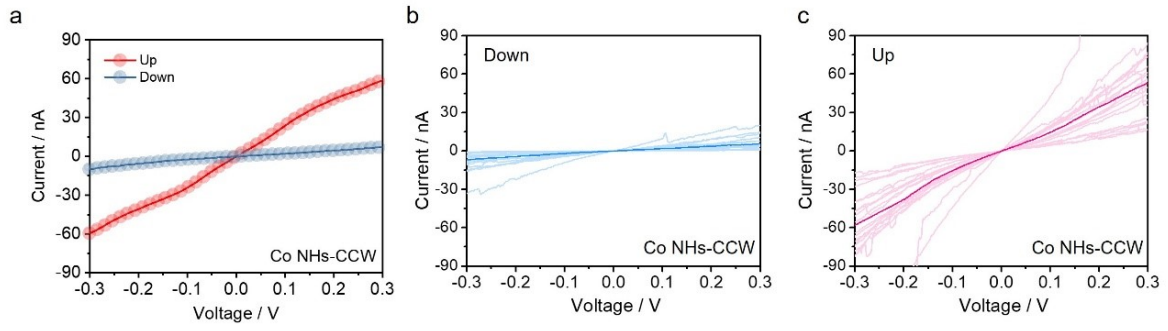

**Fig. S8** a) Average results and b, c) raw data for  $I$ - $V$  curves obtained from mCP-AFM measurements with a pre-magnetized tip aligned along the upward or downward magnetic field orientations at different positions on Co NHs-CCW.

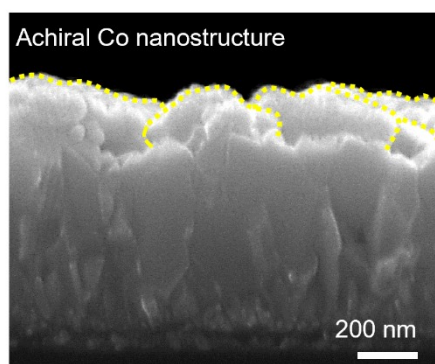

**Fig. S9** Cross-sectional image of Co achiral nanostructure.

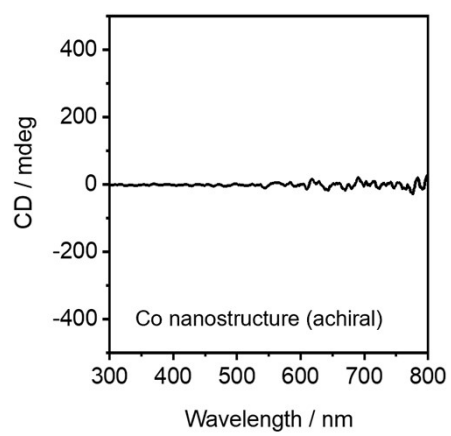

**Fig. S10** CD spectra of achiral Co nanostructure.

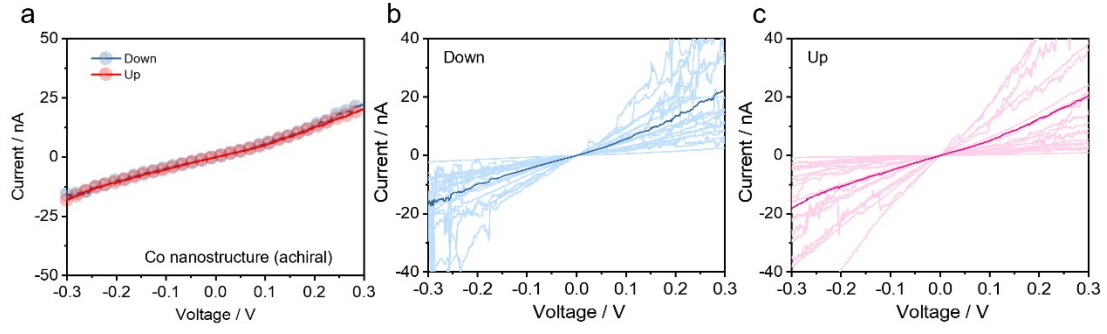

**Fig. S11** a) Average results and b), c) raw data for  $I$ – $V$  curves obtained from mCP-AFM measurements with a pre-magnetized tip aligned along the upward or downward magnetic field orientations at different positions on the achiral Co nanostructure.

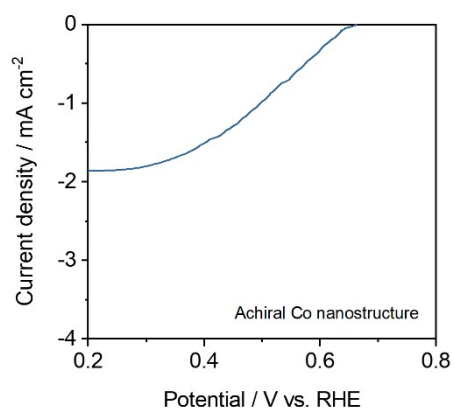

**Fig. S12** LSV curve of achiral Co nanostructure in O<sub>2</sub>-saturated 0.1 M KOH.

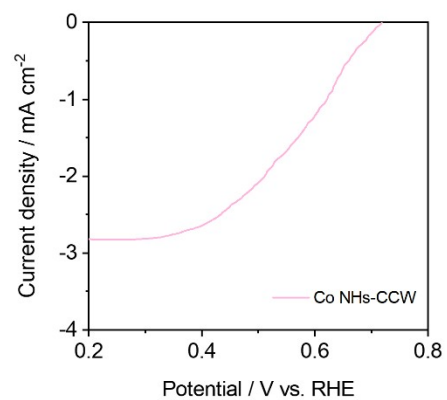

**Fig. S13** LSV curve of Co NHs-CCW in O<sub>2</sub>-saturated 0.1 M KOH.

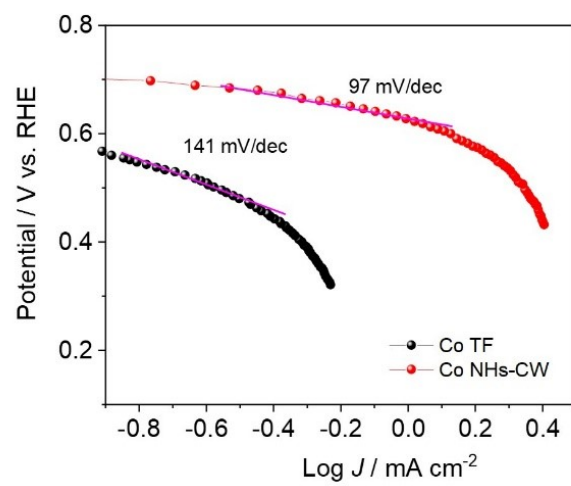

**Fig. S14** Tafel slopes of Co NHs-CW and TF in the 2e<sup>-</sup> ORR process.

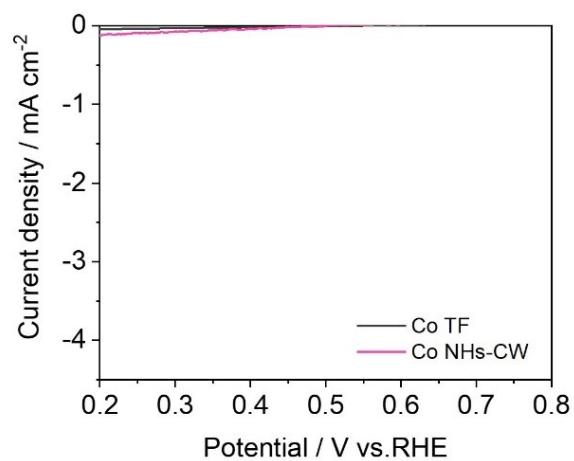

**Fig. S15** LSV curves of Co NHs-CW and Co TF, measured in Ar-saturated 0.1 M KOH in the absence of oxygen.



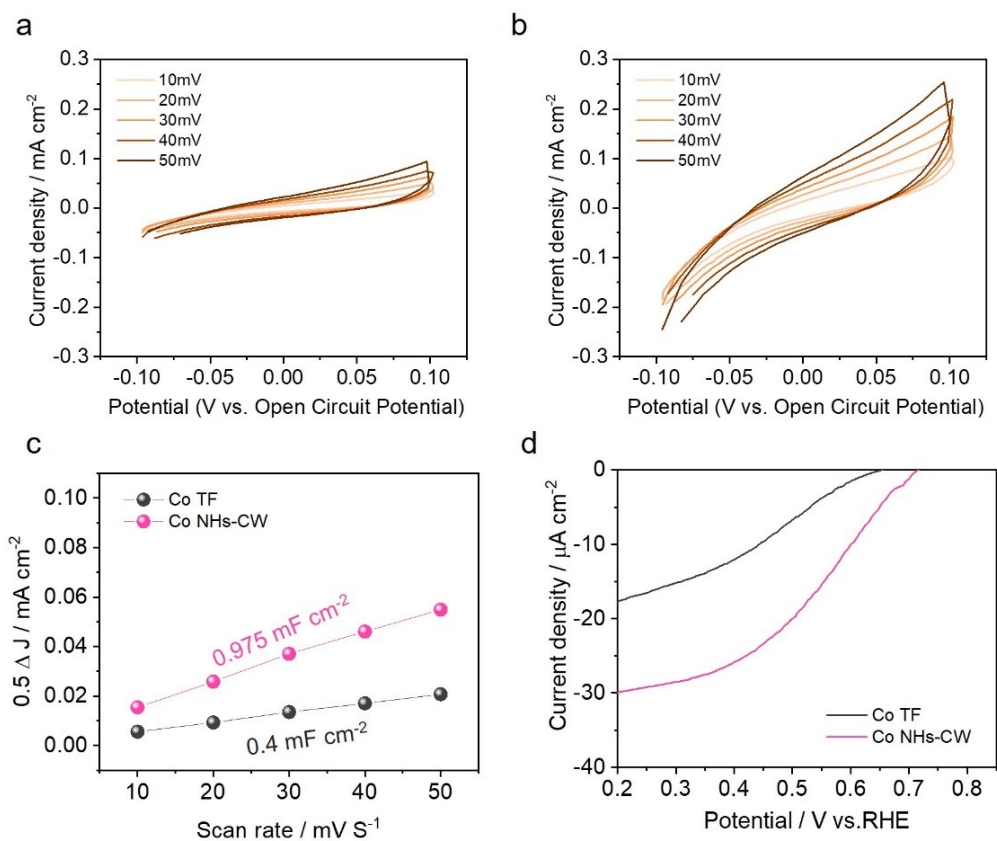

**Fig. S16** CV curves for a) Co NHs-CW and b) Co TF in O<sub>2</sub>-saturated 0.1 M KOH. c) Capacitive current densities of Co NHs-CW and Co TF as a function of scan rate. d) LSV curves for Co NHs-CW and Co TF in O<sub>2</sub>-saturated 0.1 M KOH, based on ECSA-normalized current densities.

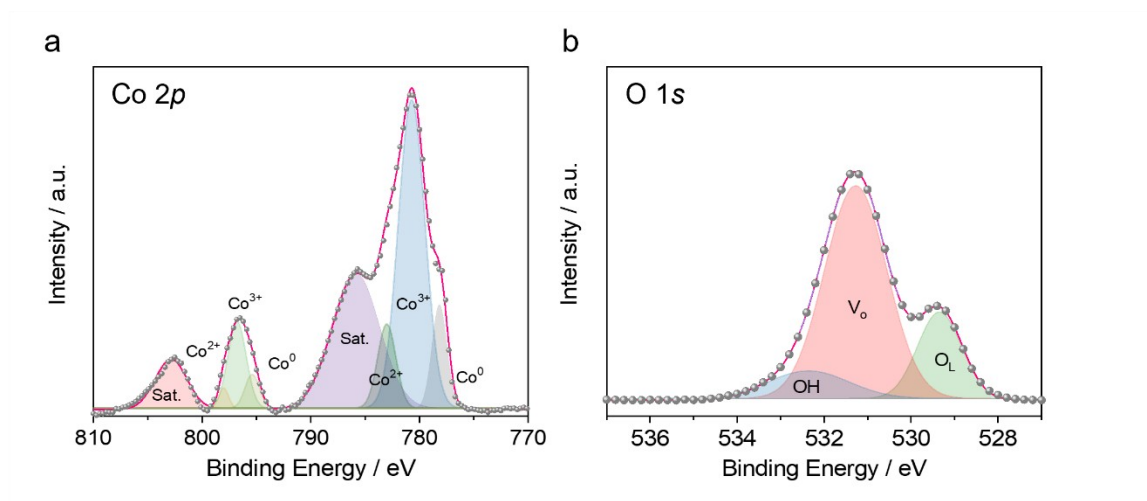

**Fig. S17** XPS spectra of a) Co 2*p* and b) O 1*s* for Co TF.

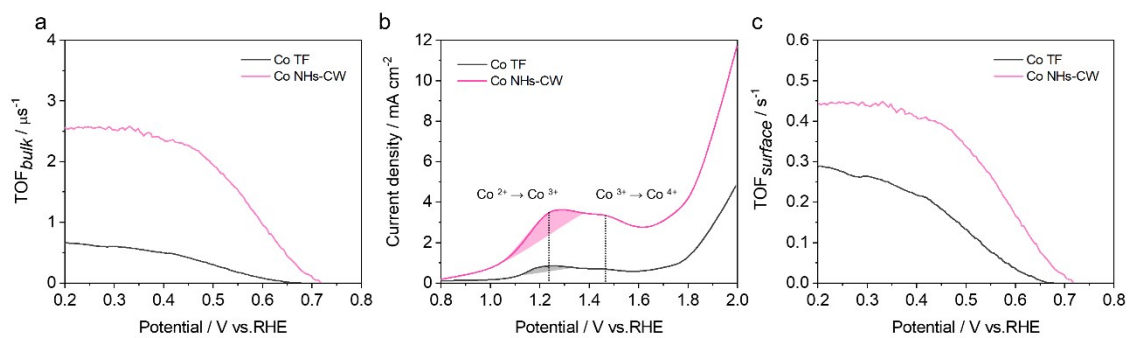

**Fig. S18** a) Bulk TOF of Co TF and Co NHs-CW catalysts. b) CV measurement obtained in Ar-saturated 0.1 M KOH showing the characteristic Co redox transitions, and c) surface TOF derived from the integrated area of the oxidation peak for Co TF and Co NHs-CW catalysts.

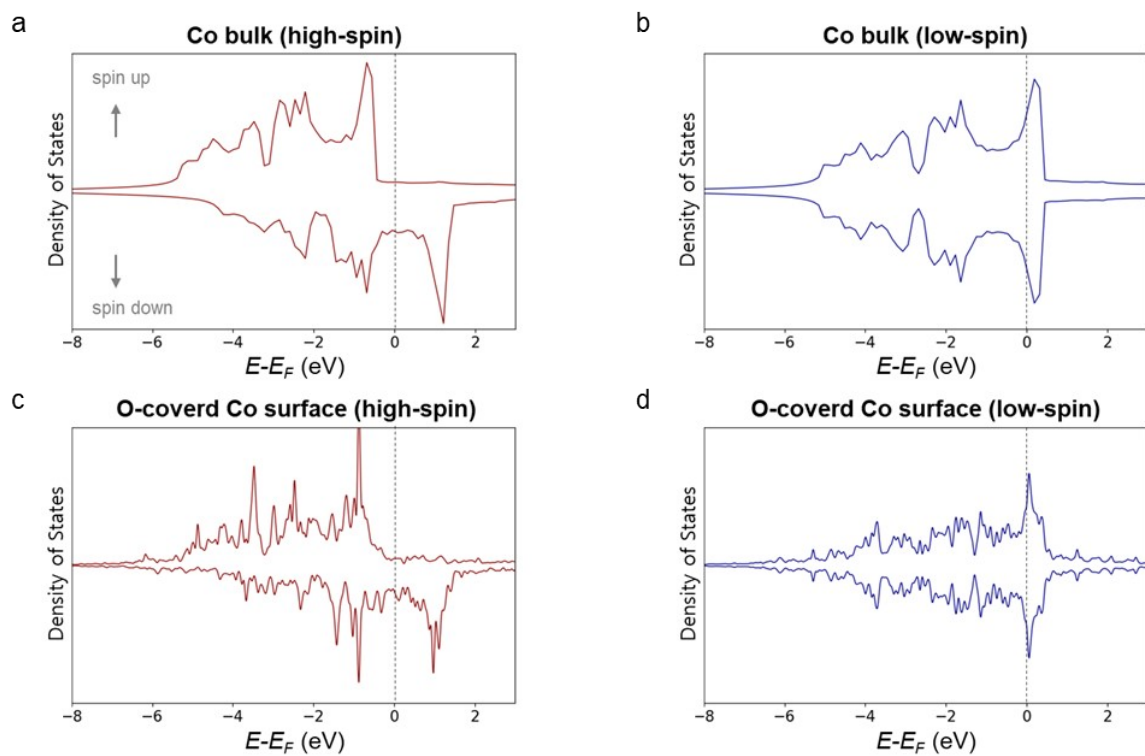

**Fig. S19** Spin-polarized density of states (DOS) for cobalt in different electronic configurations: a) bulk Co in high-spin state, b) bulk Co in low-spin state, c) Co atoms on O-covered Co(002) surface in high-spin state, and d) Co atoms on O-covered Co(002) surface in low-spin state.

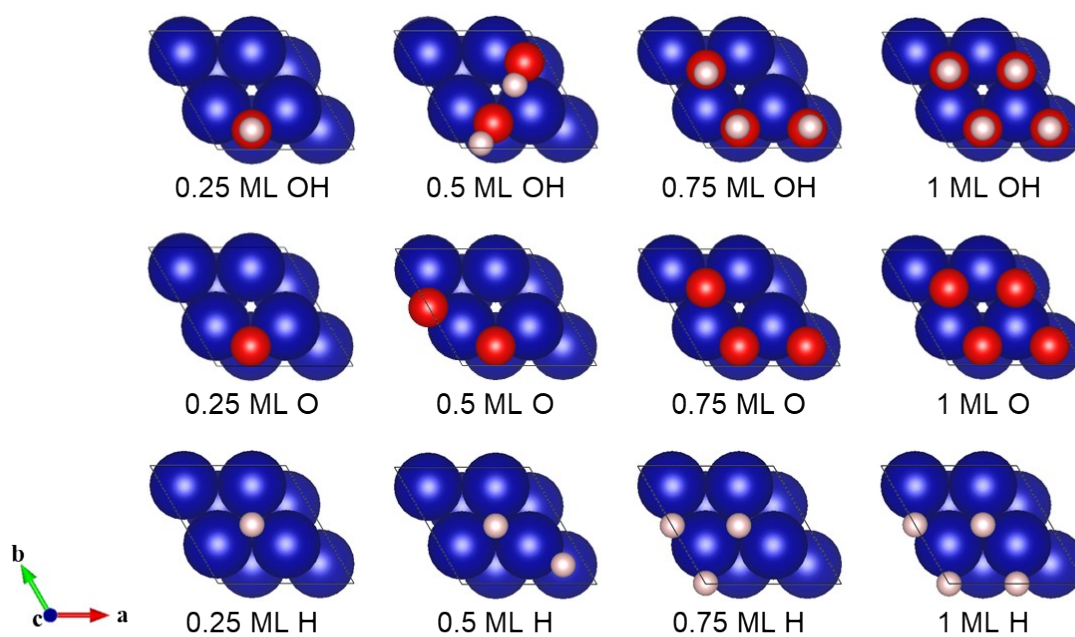

**Fig. S20** Top views of adsorbate-covered Co(002) surfaces modeled using a  $p(2\times 2)$  supercell. Studied configurations include 0.25, 0.5, 0.75, and 1 ML coverages of O, OH, and H species. Blue, red, and light pink spheres represent Co, O, and H atoms, respectively.

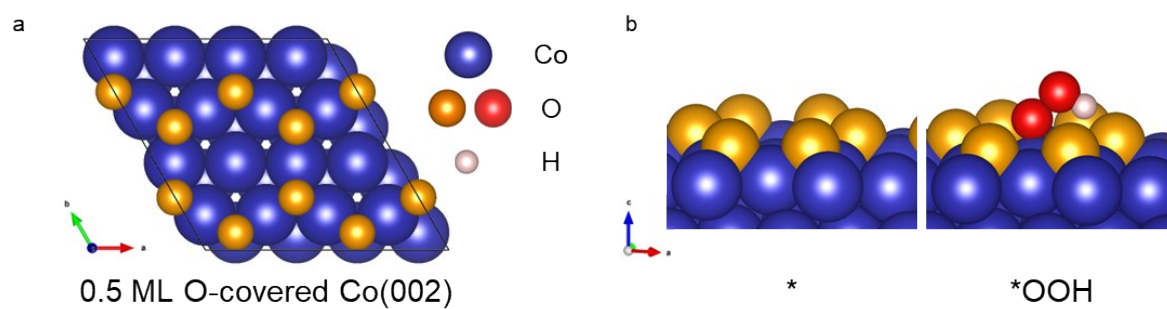

**Fig. S21** a) Top view of the 0.5 ML O-covered Co(002) surface. b) Relaxed structures of the active site (\*) and \*OOH adsorbate.

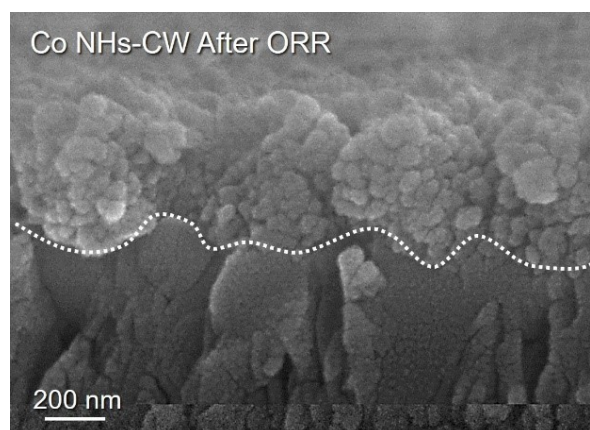

**Fig. S22** Cross-sectional SEM images of Co NHs-CW after long-term stability test.

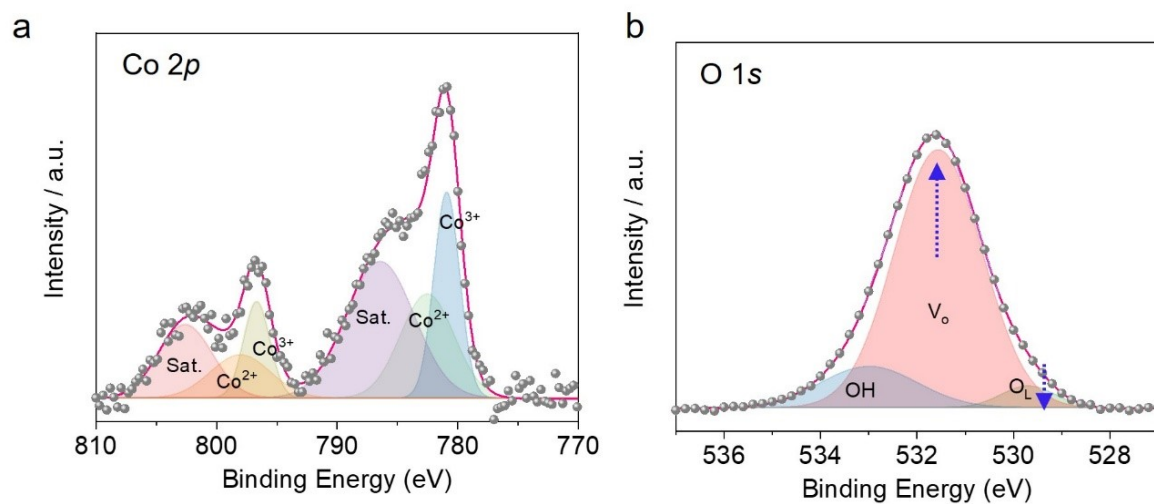

**Fig. S23** High-resolution XPS spectra of Co NHs-CW after long-term stability test: deconvolutions of a) Co 2p and b) O 1s regions.



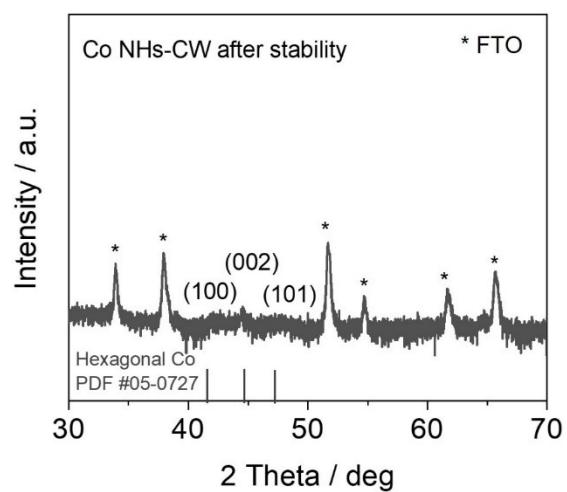

**Fig. S24** XRD patterns of Co NHs-CW after long-term stability test.

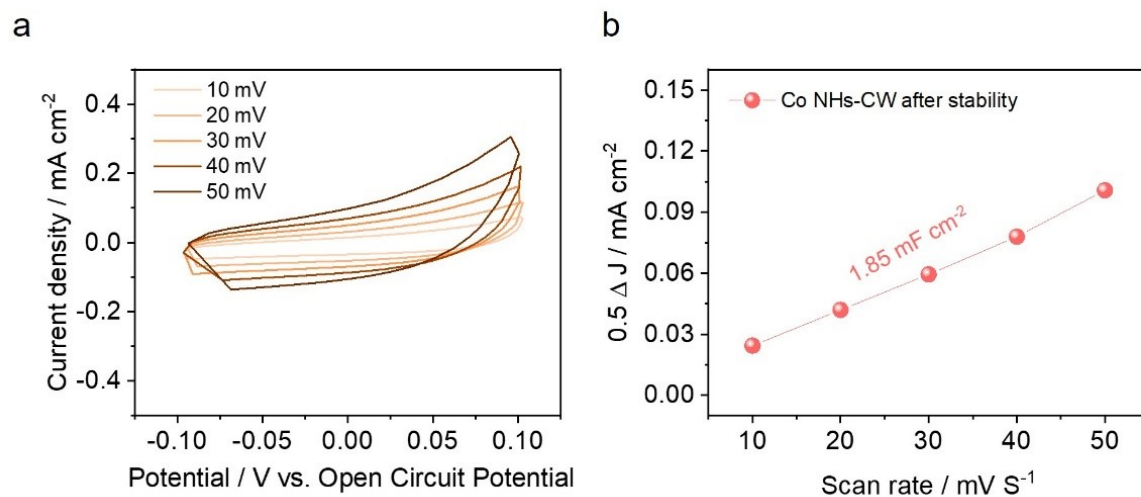

**Fig. S25** a) CV curves for Co NHs-CW after long-term stability test in O<sub>2</sub>-saturated 0.1 M KOH. b) Capacitive current density of Co NHs-CW after long-term stability test as a function of scan rate.

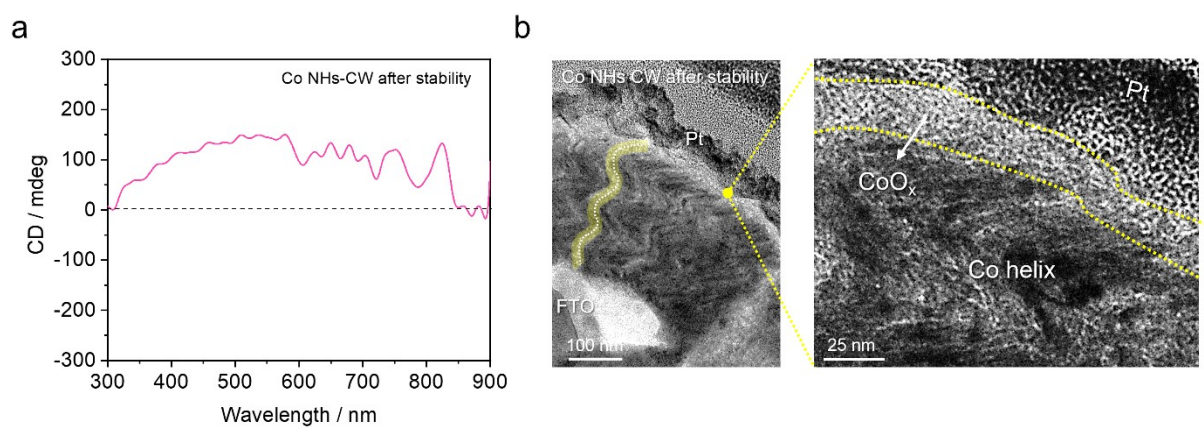

**Fig. S26** a) CD spectrum and b) cross-sectional TEM image of Co NHs-CW after long-term stability test.

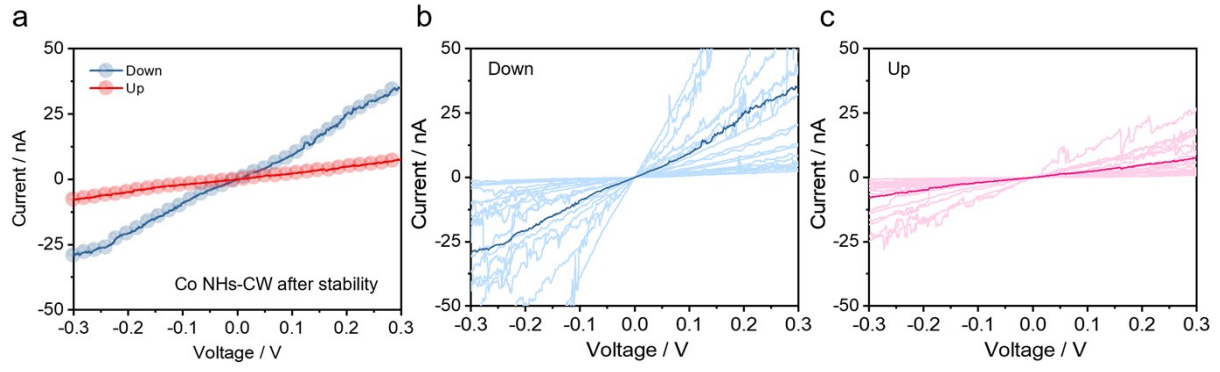

**Fig. S27** a) Average results and b),c) raw data for  $I$ – $V$  curves obtained from mCP-AFM measurements with a pre-magnetized tip aligned along the upward or downward magnetic field orientations at different positions on Co NHs-CW after stability test.

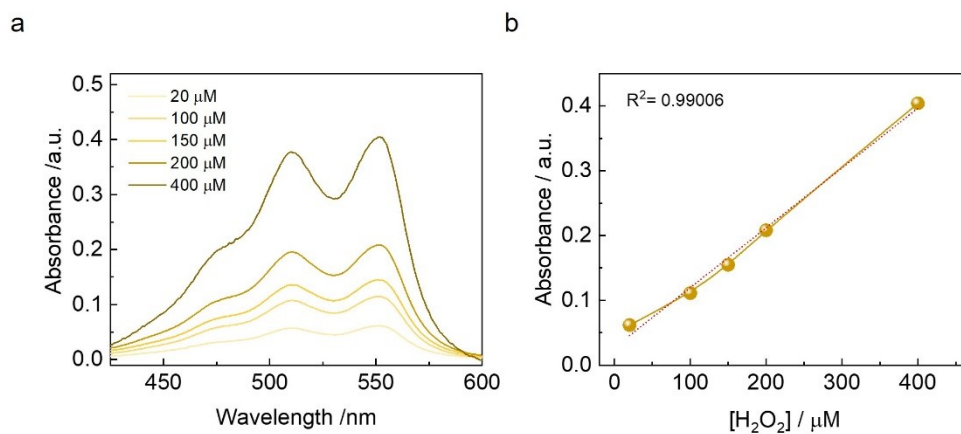

**Fig. S28** a) Absorbance spectra for different (known) contents of  $\text{H}_2\text{O}_2$ . A calibration curve was obtained based on the absorbance at 551 nm, using the colorimetric method. b) Resulting calibration curve as a function of  $\text{H}_2\text{O}_2$  content.

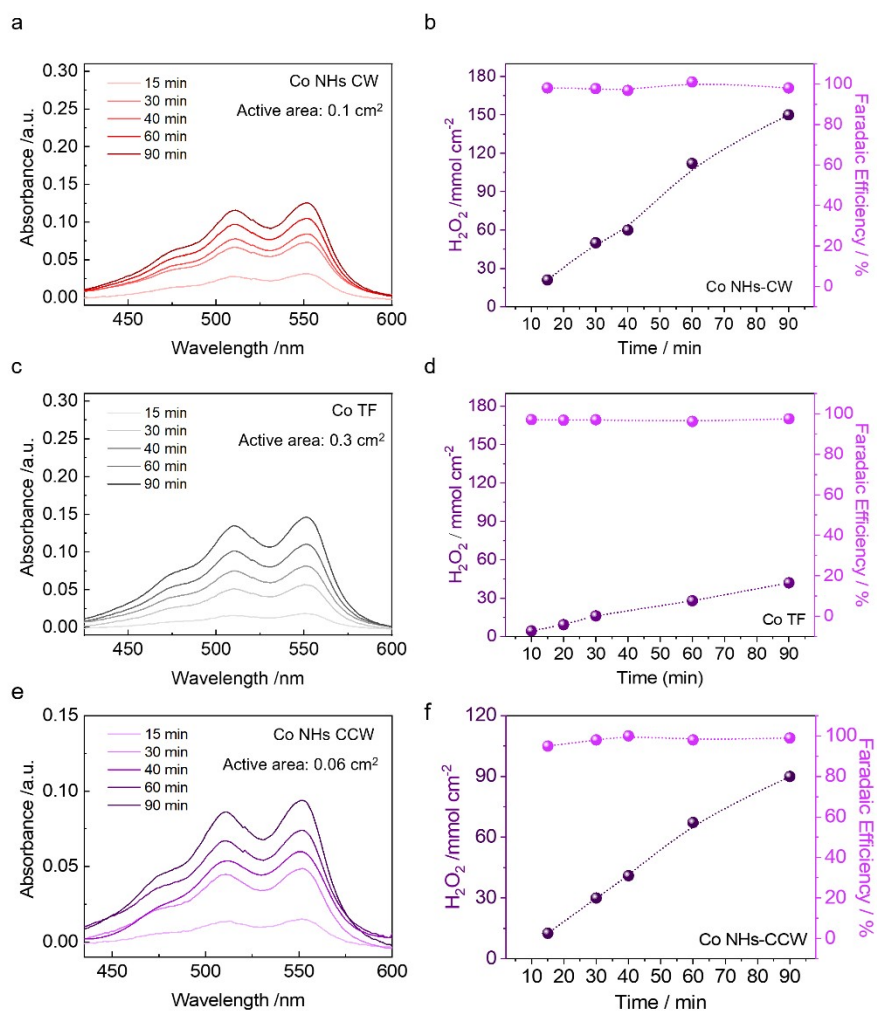

**Fig. S29** Time-dependent absorption spectra of electrolyte aliquot as a function of reaction time for a) Co NHs-CW, c) Co TF, and e) Co NHs-CCW. Faradaic efficiencies of b) Co NHs-CW, d) Co TF, and f) Co NHs-CCW.

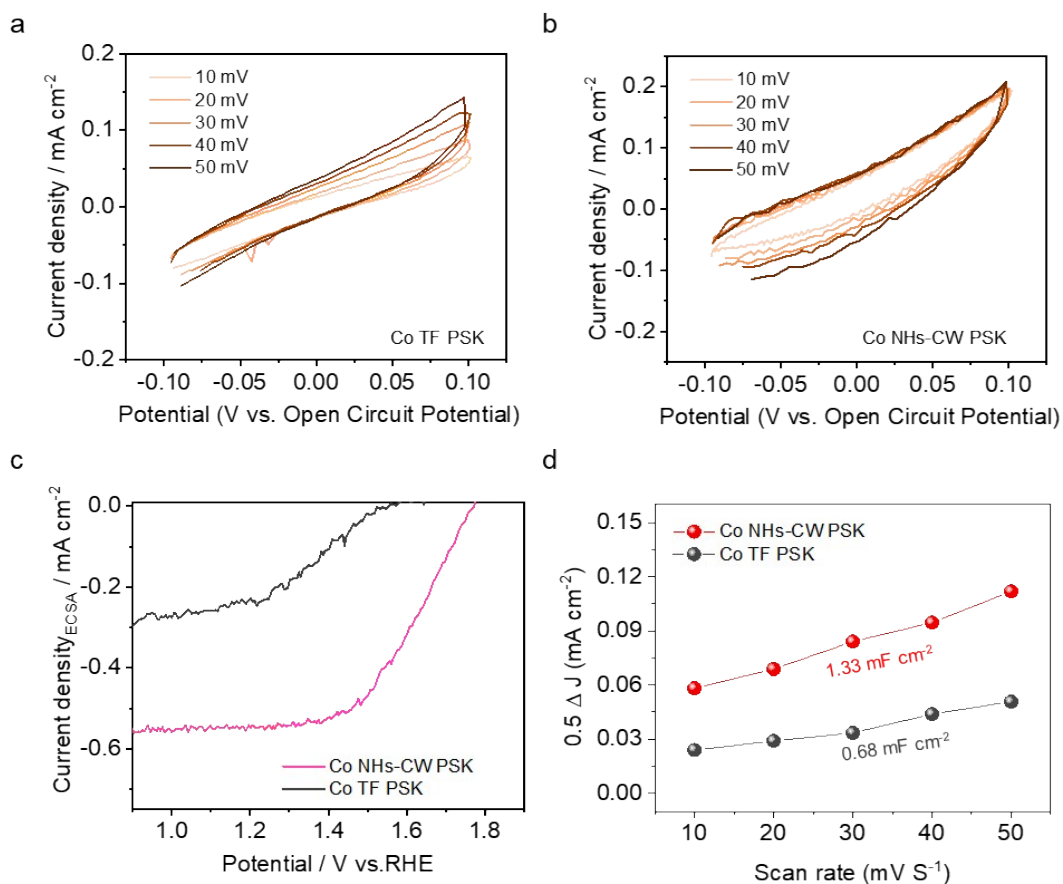

**Fig. S30** CV curves for a) Co NHs-CW PSK and b) Co TF PSK in O<sub>2</sub>-saturated 0.1 M KOH under 1-sun illumination. c) Capacitive current densities of Co NHs-CW PSK and Co TF PSK as a function of scan rate. d) LSV curves for Co NHs-CW PSK and Co TF PSK in O<sub>2</sub>-saturated 0.1 M KOH under 1-sun illumination, based on ECSA-normalized current density.

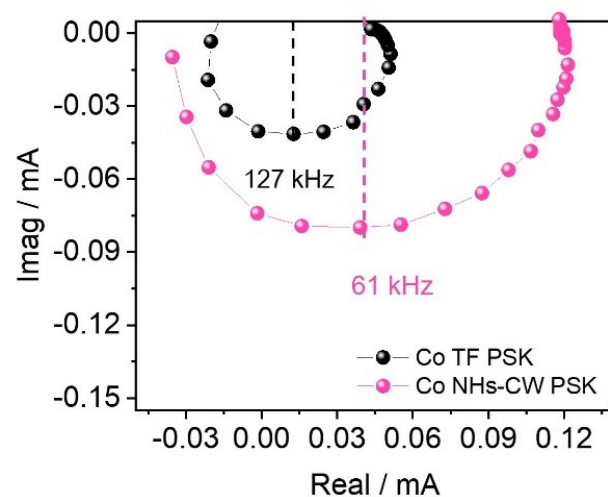

**Fig. S31** Nyquist plots of IMPS spectra for Co NHs-CW PSK and Co TF PSK at 1.1  $V_{\text{RHE}}$  in  $\text{O}_2$ -saturated 0.1 M KOH.



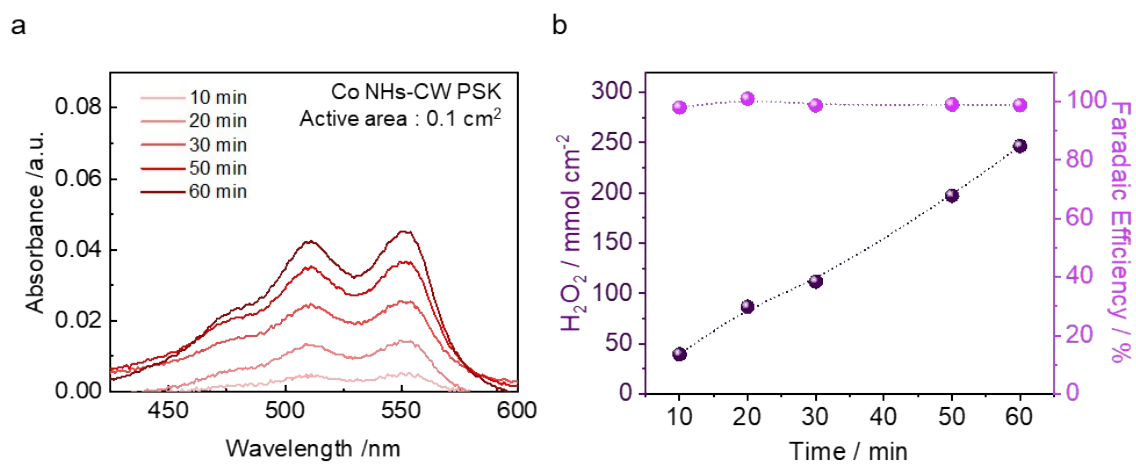

**Fig. S32** a) Time-dependent absorption spectra of electrolyte aliquot as a function of reaction time for Co NHs-CW PSK. b) Faradaic efficiency of Co NHs-CW PSK.

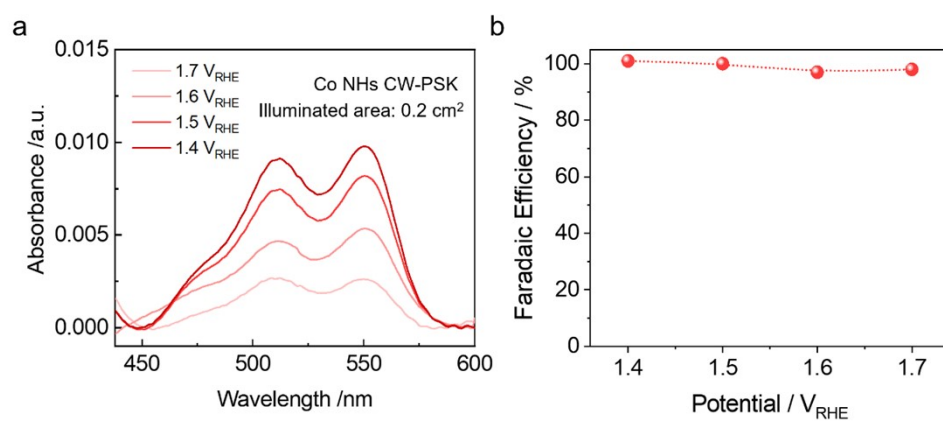

**Fig. S33** a) Potential-dependent absorption spectra of the electrolyte aliquot as a function of potential and b) Faradaic efficiency for Co NHs-CW-PSK.

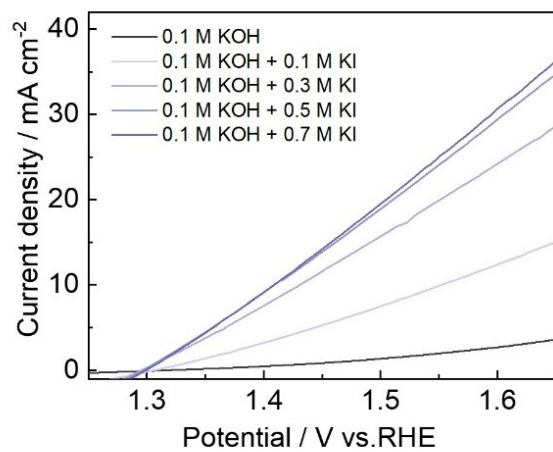

**Fig. S34** LSV curves for carbon cloth electrode in 0.1 M KOH electrolyte with varying concentrations of KI.

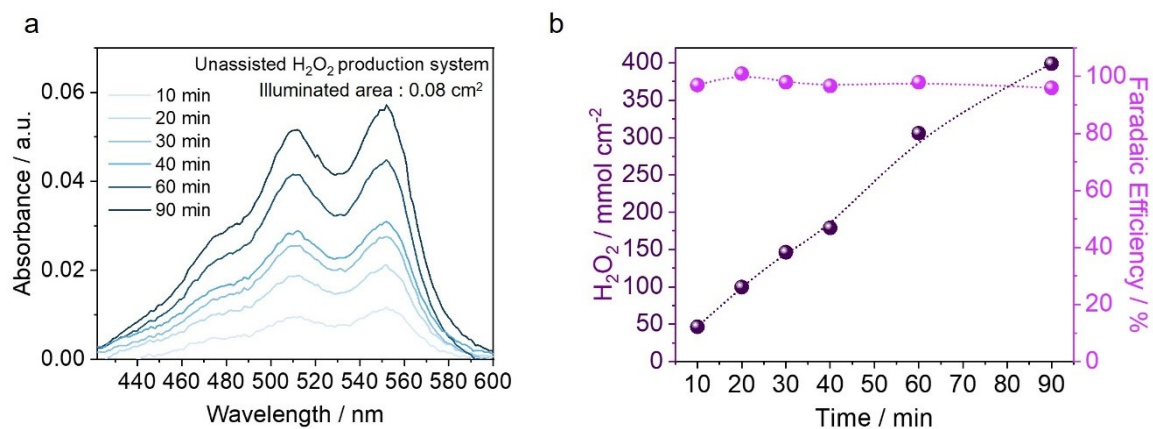

**Fig. S35** a) Time-dependent absorption spectra of electrolyte aliquot as a function of reaction time for unassisted  $\text{H}_2\text{O}_2$  production system. b) Faradaic efficiency of unassisted  $\text{H}_2\text{O}_2$  production system.

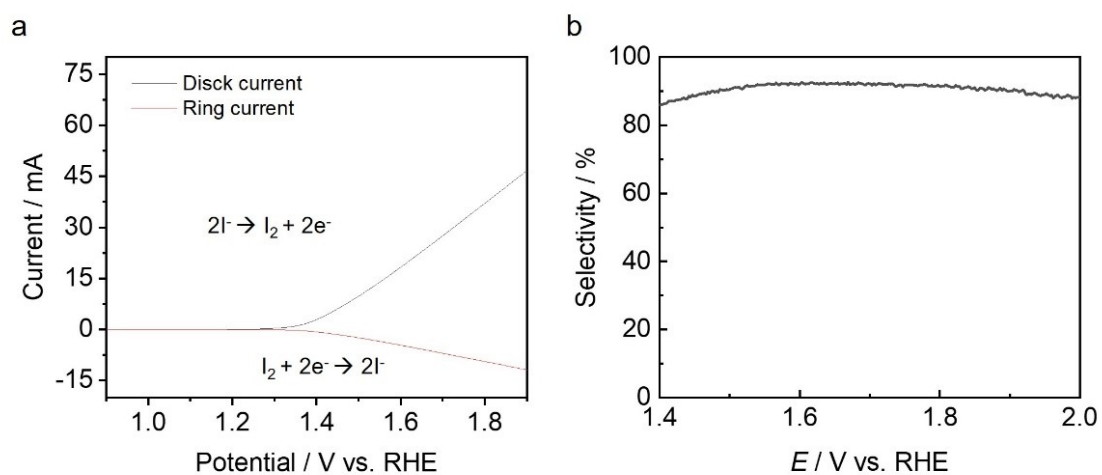

**Fig. S36** a) Plots of disk current derived from graphite powders and ring current induced by Pt ring electrode in 0.1 M KOH + 0.5 M KI. b) Faradaic efficiency of IOR driven by graphite powders, based on RRDE analysis.

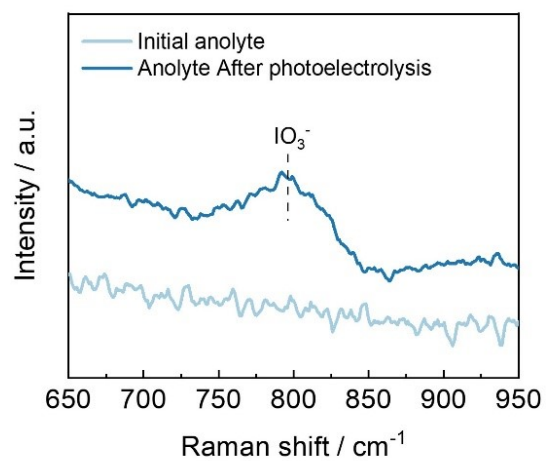

**Fig. S37** Liquid Raman spectrum of final product of IOR in anolyte after photoelectrolysis driven by unbiased H<sub>2</sub>O<sub>2</sub> production device.

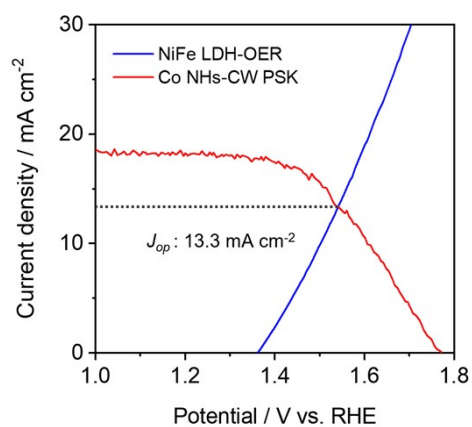

**Fig. S38** LSV curves for Co NHs-CW PSK and NiFe LDH OER catalyst electrodes driving the 2e<sup>-</sup> ORR and OER processes, respectively.

**Supplementary Table S1.** Fitted impedance data of Co NHs-CW PSK and Co TF PSK.

| <b>Co NHs-CW PSK</b> | <b><math>R_s / \Omega \cdot \text{cm}^2</math></b> | <b><math>R_{ct} / \Omega \cdot \text{cm}^2</math></b> |
|----------------------|----------------------------------------------------|-------------------------------------------------------|
| 1.0 V <sub>RHE</sub> | 2.76                                               | 30.42                                                 |
| 1.1 V <sub>RHE</sub> | 2.75                                               | 34.13                                                 |
| 1.2 V <sub>RHE</sub> | 2.73                                               | 45.06                                                 |
| 1.3 V <sub>RHE</sub> | 2.75                                               | 56.90                                                 |
|                      |                                                    |                                                       |
| <b>Co TF PSK</b>     | <b><math>R_s / \Omega \cdot \text{cm}^2</math></b> | <b><math>R_{ct} / \Omega \cdot \text{cm}^2</math></b> |
| 1.0 V <sub>RHE</sub> | 1.81                                               | 91.22                                                 |
| 1.1 V <sub>RHE</sub> | 1.84                                               | 102.40                                                |
| 1.2 V <sub>RHE</sub> | 1.86                                               | 119.62                                                |
| 1.3 V <sub>RHE</sub> | 1.82                                               | 139.37                                                |



**Supplementary Table S2.** Comparison table of SCC efficiencies of the present bias-free H<sub>2</sub>O<sub>2</sub> production system based on the ORR-IOR configuration with previously reported unbiased systems using the OER as the anodic reaction.

| <b>Year</b> | <b>Electrode component</b>                                                   | <b>Coupled system</b> | <b>Stability / h</b> | <b>FE / %</b> | <b>SCC / %</b> | <b>Ref.</b>      |
|-------------|------------------------------------------------------------------------------|-----------------------|----------------------|---------------|----------------|------------------|
| <b>2019</b> | TiO <sub>2</sub> photoanode    cathode Co-N/CNT                              | ORR-OER               | 27.8 h               | 64%           | 0.2%           | S1               |
| <b>2020</b> | NiFeO <sub>x</sub> /BiVO <sub>4</sub> photoanode    cathode PTT <sub>h</sub> | ORR-OER               | 14 h                 | 90%           | 0.7%           | S2               |
| <b>2020</b> | P-Mo-BiVO <sub>4</sub>    AQ-CNT/C                                           | ORR-OER               | 5 h                  | 100%          | 0.1%           | S3               |
| <b>2021</b> | $\alpha$ -NiFeO <sub>x</sub>    O-BP/FM/PSK                                  | ORR-OER               | 12 h                 | 100%          | 1.46%          | S4               |
| <b>2021</b> | RuO <sub>x</sub> /TNR    AQ/graphite                                         | ORR-OER               | 100 h                | 90%           | 0.37%          | S5               |
| <b>2022</b> | SnO <sub>2-x</sub> /BiVO <sub>4</sub> /WO <sub>3</sub> -PTFE@Mo-SACs/mrG-GDE | ORR-OER               | 1 h                  | 80%           | 1.46%          | S6               |
| <b>2022</b> | CoPi/BiVO <sub>4</sub>    Co-N/CNT                                           | ORR-OER               | 5 h                  | 80%           | 0.64%          | S7               |
| <b>2022</b> | 2m-LDH/Ni/eu@nfOP    Co-containing LDH                                       | ORR-OER               | 4 h                  | 90%           | 3.24%          | S8               |
| <b>2023</b> | Mg:Ta <sub>3</sub> N <sub>5</sub>    Nafion    CC/CMK-3                      | ORR-OER               | 3 h                  | 70%           | 2.33%          | S9               |
| <b>2024</b> | CBS-based photocathode    PSK-based anode                                    | ORR-OER               | 10 h                 | 90%           | 1.46%          | S10              |
| <b>2025</b> | <b>Co NHs-CW PSK    carbon cloth</b>                                         | <b>ORR-IOR</b>        | <b>20 h</b>          | <b>97%</b>    | <b>9.4%</b>    | <b>This work</b> |

**Supplementary Table S3.** Calculated zero-point energy(ZPE) and experimental entropy contributions (TS) at 300K for molecules and adsorbate. TS terms for gas-phase species were taken from literature.<sup>S11</sup> The free energy of liquid water (H<sub>2</sub>O(l)) was referenced to that of water vapor at equilibrium partial pressure of 0.035 bar at 300K.

| molecule/adsorbate | ZPE (eV) | TS (eV)             |
|--------------------|----------|---------------------|
| H <sub>2</sub>     | 0.27     | 0.41                |
| H <sub>2</sub> O   | 0.56     | 0.67<br>(0.035 bar) |
| *O                 | 0.08     | -                   |
| *OH                | 0.35     | -                   |
| *H                 | 0.18     | -                   |
| *OOH               | 0.44     | -                   |

## Supporting Information References

- [S1] Ko, M., Pham, L.T.M., Sa, Y.J., Woo, J., Nguyen, T.V.T., Kim, J.H., Oh, D., Sharma, P., Ryu, J., Shin, T.J., et al. *Nat., Commun.*, 2019, **10**, 5123.
- [S2] Fan, W., Zhang, B., Wang, X., Ma, W., Li, D., Wang, Z., Dupuis, M., Shi, J., Liao, S., and Li, C. *Energy Environ. Sci.*, 2020, **13**, 238-245.
- [S3] Kawashima, A.B., Martins, L.D., Rafee, S.A.A., Rudke, A.P., de Moraes, M.V., and Martins, J.A. *Environ. Sci. Pollut. Res. Int.*, 2020, **27**, 35941-35951.
- [S4] Mehrotra, R., Oh, D., and Jang, J.W. *Nat. Commun.*, 2021, **12**, 6644.
- [S5] Jeon, T.H., Kim, B., Kim, C., Xia, C., Wang, H., Alvarez, P.J.J., and Choi, W. *Energy Environ. Sci.*, 2021, **14**, 3110-3119.
- [S6] Dong, C., Yang, Y., Hu, X., Cho, Y., Jang, G., Ao, Y., Wang, L., Shen, J., Park, J.H., and Zhang, K. *Nat. Commun.*, 2022, **13**, 4982.
- [S7] Song, J., Yu, J.M., Ahn, J.H., Cho, H., Oh, J., Kim, Y.S., Kim, J., Ko, M., Lee, S.-h., Shin, T.J., et al. *Adv. Funct. Mater.*, 2022, **32**, 2110412.
- [S8] Zhu, D., Feng, C., Fan, Z., Zhang, B., Luo, X., and Li, Y. *Sustainable Energy & Fuels*, 2023, **7**, 3326-3332.
- [S9] Moon, S., Park, Y.S., Lee, H., Jeong, W., Kwon, E., Lee, J., Yun, J., Lee, S., Kim, J.H., Yu, S., and Moon, J. *Energy Environ. Sci.*, 2024, **17**, 5588-5600.
- [S10] Ko, M., Kim, Y., Woo, J., Lee, B., Mehrotra, R., Sharma, P., Kim, J., Hwang, S.W., Jeong, H.Y., Lim, H., et al. *Nat. Catal.*, 2022, **5**, 37-44.
- [S11] CRC Handbook of Chemistry and Physics, 93rd ed.; CRC Press: Boca Raton, FL, 2011–2012.
